# Supplementary material
Source: HighWire-hosted journal article supplement (https://bmjopen.bmj.com/content/11/12/e048296)
Supplement: inline-supplementary-material-1 [file inline-supplementary-material-1.pdf]

## Supplementary materials

**eTable 1. Read codes for periodontal disease exposure.**

### Gingivitis

| Code    | Description                          |
|---------|--------------------------------------|
| 2552    | O/E - gingivitis                     |
| 2556    | O/E - bleeding gums                  |
| J031z00 | Chronic gingivitis NOS               |
| 1928    | Bleeding gums                        |
| J030.00 | Acute gingivitis                     |
| J031.11 | Gingivitis                           |
| J031.00 | Chronic gingivitis                   |
| J031300 | Hyperplastic gingivitis              |
| J031200 | Desquamative gingivitis              |
| J031100 | Ulcerative gingivitis                |
| J03..11 | Gingivitis/gingival disease          |
| J031000 | Simple marginal gingivitis           |
| J03z.00 | Gingival and periodontal disease NOS |

### Periodontitis

| Code    | Description                                    |
|---------|------------------------------------------------|
| J033200 | Paradontal abscess                             |
| J034400 | Alveolar pyorrhoea                             |
| J033300 | Periodontal abscess                            |
| J03..12 | Periodontal disease                            |
| J033.00 | Acute periodontitis                            |
| 2553    | O/E - pyorrhoea                                |
| J051200 | Loss of teeth due to local periodontal disease |
| J034200 | Chronic periodontitis simplex                  |
| J033z00 | Acute periodontitis NOS                        |
| J034.00 | Chronic periodontitis                          |
| J035.00 | Periodontosis                                  |
| J034z00 | Chronic periodontitis NOS                      |

**eTable 2. Baseline characteristics of the incident cohort**

|                               | Incident cohort  |                    |
|-------------------------------|------------------|--------------------|
|                               | Exposed<br>n (%) | Unexposed<br>n (%) |
| All                           | (n=31,968)       | (n=126,278)        |
| Sex (Male)                    | 13715 (42.90)    | 54062 (42.81)      |
| Age at index date             | 48.77 (18.77)    | 48.59 (18.67)      |
| Age categories                |                  |                    |
| 18 - 24 years                 | 3788 (11.85)     | 15081 (11.94)      |
| 25 - 34 years                 | 4921 (15.39)     | 19604 (15.52)      |
| 35 - 44 years                 | 5381 (16.83)     | 21272 (16.85)      |
| 45 - 54 years                 | 5411 (16.93)     | 21518 (17.04)      |
| 55 - 64 years                 | 5124 (16.03)     | 20212 (16.01)      |
| 65 - 74 years                 | 4028 (12.60)     | 15908 (12.60)      |
| 75 & overs                    | 3315 (10.37)     | 12683 (10.04)      |
| BMI                           | 26.60 (5.73)     | 26.62 (5.62)       |
| BMI Categories                |                  |                    |
| Under/Normal weight (18.5-25) | 11755 (36.77)    | 45183 (35.78)      |
| Overweight (25-30)            | 8573 (26.82)     | 34623 (27.42)      |
| Obese (>30)                   | 6192 (19.37)     | 23359 (18.50)      |
| Missing                       | 5448 (17.04)     | 23113 (18.30)      |
| Townsend quintiles            |                  |                    |
| 1 (Least deprived)            | 5813 (18.18)     | 21910 (17.35)      |
| 2                             | 5346 (16.72)     | 19600 (15.52)      |
| 3                             | 6118 (19.14)     | 22190 (17.57)      |
| 4                             | 6079 (19.02)     | 21452 (16.99)      |
| 5 (Most deprived)             | 4810 (15.05)     | 15776 (12.49)      |
| Missing                       | 3802 (11.89)     | 25350 (20.07)      |
| Smoking categories            |                  |                    |
| Non-smoker                    | 14514 (45.40)    | 57617 (45.63)      |
| Smoker                        | 9452 (29.57)     | 37338 (29.57)      |
| Ex-smoker                     | 6494 (20.31)     | 25445 (20.15)      |
| Missing                       | 1508 (4.72)      | 5878 (4.65)        |
| Ethnicity                     |                  |                    |
| Caucasian                     | 11976 (37.46)    | 49505 (39.20)      |
| Mixed race                    | 229 (0.72)       | 764 (0.61)         |
| Other                         | 101 (0.32)       | 358 (0.28)         |
| Black                         | 509 (1.59)       | 1415 (1.12)        |
| South Asian                   | 1510 (4.72)      | 2154 (1.71)        |
| Missing                       | 17643 (55.19)    | 72082 (57.08)      |

**eTable 3. Risk of chronic diseases at baseline in the incident only sensitivity analysis cohort**

|                                                     | All cardiovascular disease |               | Heart failure               |                | Ischaemic heart disease      |              | Stroke/transient-ischaemic attack |                | Peripheral vascular disease |              |
|-----------------------------------------------------|----------------------------|---------------|-----------------------------|----------------|------------------------------|--------------|-----------------------------------|----------------|-----------------------------|--------------|
|                                                     | Exposed                    | Unexposed     | Exposed                     | Unexposed      | Exposed                      | Unexposed    | Exposed                           | Unexposed      | Exposed                     | Unexposed    |
| Total number of patients                            | 31,968                     | 126,278       | 31,968                      | 126,278        | 31,968                       | 126,278      | 31,968                            | 126,278        | 31,968                      | 126,278      |
| Number of patients with condition at baseline, n(%) | 3,700 (11.57)              | 11,032 (8.74) | 524 (1.64)                  | 1,541 (1.22)   | 2,352 (7.36)                 | 7,022 (5.56) | 1,260 (3.94)                      | 3,660 (2.90)   | 478 (1.50)                  | 1,388 (1.10) |
| OR (95% CI)*                                        | 1.37 (1.31-1.42)           |               | 1.35 (1.22-1.49)            |                | 1.35 (1.29-1.42)             |              | 1.37 (1.29-1.47)                  |                | 1.37 (1.23-1.52)            |              |
| P value                                             | p<0.01                     |               | p<0.01                      |                | p<0.01                       |              | p<0.01                            |                | p<0.01                      |              |
| aOR (95% CI)**                                      | 1.42 (1.36-1.49)           |               | 1.30 (1.18-1.45)            |                | 1.35 (1.28-1.42)             |              | 1.36 (1.27-1.46)                  |                | 1.31 (1.18-1.46)            |              |
| P value                                             | p<0.01                     |               | p<0.01                      |                | p<0.01                       |              | p<0.01                            |                | p<0.01                      |              |
|                                                     | Vascular dementia          |               | All cardiometabolic disease |                | Type 2 diabetes mellitus     |              | Hypertension                      |                | All autoimmune conditions   |              |
|                                                     | Exposed                    | Unexposed     | Exposed                     | Unexposed      | Exposed                      | Unexposed    | Exposed                           | Unexposed      | Exposed                     | Unexposed    |
| Total number of patients, n                         | 31,968                     | 126,278       | 31,968                      | 126,278        | 31,968                       | 126,278      | 31,968                            | 126,278        | 31,968                      | 126,278      |
| Number of patients with condition at baseline, n(%) | 89 (0.28)                  | 204 (0.16)    | 7,488 (23.42)               | 26,602 (21.07) | 2,126 (6.65)                 | 6,773 (5.36) | 6,597 (20.64)                     | 23,995 (19.00) | 2,833 (8.86)                | 8,948 (7.09) |
| OR (95% CI)*                                        | 1.73 (1.34-2.21)           |               | 1.15 (1.11-1.18)            |                | 1.26 (1.20-1.32)             |              | 1.11 (1.08-1.14)                  |                | 1.28 (1.22-1.33)            |              |
| P value                                             | p<0.01                     |               | p<0.01                      |                | p<0.01                       |              | p<0.01                            |                | p<0.01                      |              |
| aOR (95% CI)**                                      | 1.64 (1.27-2.12)           |               | 1.14 (1.10-1.19)            |                | 1.15 (1.09-1.22)             |              | 1.10 (1.06-1.15)                  |                | 1.26 (1.21-1.32)            |              |
| P value                                             | p<0.01                     |               | p<0.01                      |                | p<0.01                       |              | p<0.01                            |                | p<0.01                      |              |
|                                                     | Type 1 diabetes mellitus   |               | Rheumatoid arthritis        |                | Systemic lupus erythematosus |              | Sjogren                           |                | Vitiligo                    |              |
|                                                     | Exposed                    | Unexposed     | Exposed                     | Unexposed      | Exposed                      | Unexposed    | Exposed                           | Unexposed      | Exposed                     | Unexposed    |
| Total number of patients, n                         | 31,968                     | 126,278       | 31,968                      | 126,278        | 31,968                       | 126,278      | 31,968                            | 126,278        | 31,968                      | 126,278      |

|                                                     |                    |              |                                     |                |                                   |                |                  |               |                               |              |
|-----------------------------------------------------|--------------------|--------------|-------------------------------------|----------------|-----------------------------------|----------------|------------------|---------------|-------------------------------|--------------|
| Number of patients with condition at baseline, n(%) | 304 (0.95)         | 836 (0.66)   | 403 (1.26)                          | 1,044 (0.83)   | 104 (0.33)                        | 189 (0.15)     | 58 (0.18)        | 119 (0.09)    | 130 (0.41)                    | 355 (0.28)   |
| OR (95% CI)*                                        | 1.44 (1.26-1.64)   |              | 1.53 (1.36-1.72)                    |                | 2.18 (1.71-2.77)                  |                | 1.93 (1.41-2.64) |               | 1.45 (1.18-1.77)              |              |
| P value                                             | p<0.01             |              | p<0.01                              |                | p<0.01                            |                | p<0.01           |               | p<0.01                        |              |
| aOR (95% CI)**                                      | 1.40 (1.23-1.61)   |              | 1.48 (1.32-1.67)                    |                | 2.14 (1.68-2.73)                  |                | 1.79 (1.30-2.47) |               | 1.31 (1.07-1.61)              |              |
| P value                                             | p<0.01             |              | p<0.01                              |                | p<0.01                            |                | p<0.01           |               | p=0.01                        |              |
|                                                     | <b>Psoriasis</b>   |              | <b>Pernicious anaemia</b>           |                | <b>Inflammatory bowel disease</b> |                | <b>Coeliac</b>   |               | <b>Autoimmune thyroiditis</b> |              |
|                                                     | Exposed            | Unexposed    | Exposed                             | Unexposed      | Exposed                           | Unexposed      | Exposed          | Unexposed     | Exposed                       | Unexposed    |
| Total number of patients, n                         | 31,968             | 126,278      | 31,968                              | 126,278        | 31,968                            | 126,278        | 31,968           | 126,278       | 31,968                        | 126,278      |
| Number of patients with condition at baseline, n(%) | 1,362 (4.26)       | 4,558 (3.61) | 134 (0.42)                          | 457 (0.36)     | 317 (0.99)                        | 1,031 (0.82)   | 119 (0.37)       | 336 (0.27)    | 104 (0.33)                    | 408 (0.32)   |
| OR (95% CI)*                                        | 1.19 (1.12-1.26)   |              | 1.16 (0.96-1.41)                    |                | 1.22 (1.07-1.38)                  |                | 1.40 (1.14-1.73) |               | 1.01 (0.81-1.25)              |              |
| P value                                             | p<0.01             |              | p=0.13                              |                | p<0.01                            |                | p<0.01           |               | p=0.95                        |              |
| aOR (95% CI)**                                      | 1.19 (1.12-1.27)   |              | 1.10 (0.90-1.34)                    |                | 1.21 (1.07-1.38)                  |                | 1.41 (1.14-1.74) |               | 0.98 (0.79-1.22)              |              |
| P value                                             | p<0.01             |              | p=0.35                              |                | p<0.01                            |                | p<0.01           |               | p=0.84                        |              |
|                                                     | <b>Scleroderma</b> |              | <b>All mental health conditions</b> |                | <b>Depression</b>                 |                | <b>Anxiety</b>   |               | <b>Severe mental illness</b>  |              |
|                                                     | Exposed            | Unexposed    | Exposed                             | Unexposed      | Exposed                           | Unexposed      | Exposed          | Unexposed     | Exposed                       | Unexposed    |
| Total number of patients, n                         | 31,968             | 126,278      | 31,968                              | 126,278        | 31,968                            | 126,278        | 31,968           | 126,278       | 31,968                        | 126,278      |
| Number of patients with condition at baseline, n(%) | 23 (0.07)          | 59 (0.05)    | 10,036 (31.39)                      | 27,197 (21.54) | 7,187 (22.48)                     | 19,341 (15.32) | 4,894 (15.31)    | 12,153 (9.62) | 703 (2.20)                    | 1,651 (1.31) |
| OR (95% CI)*                                        | 1.54 (0.95-2.49)   |              | 1.67 (1.62-1.71)                    |                | 1.60 (1.56-1.65)                  |                | 1.70 (1.64-1.76) |               | 1.70 (1.55-1.86)              |              |
| P value                                             | p=0.08             |              | p<0.01                              |                | p<0.01                            |                | p<0.01           |               | p<0.01                        |              |

|                |                  |                  |                  |                  |                  |
|----------------|------------------|------------------|------------------|------------------|------------------|
| aOR (95% CI)** | 1.45 (0.89-2.37) | 1.71 (1.66-1.76) | 1.63 (1.58-1.68) | 1.71 (1.65-1.78) | 1.68 (1.53-1.84) |
| P value        | p=0.14           | p<0.01           | p<0.01           | p<0.01           | p<0.01           |

\* Unadjusted odds ratio, OR: odds ratio, aOR: adjusted odds ratio

\*\* Adjusted odds ratio: adjusted for age, sex, body mass index, Townsend deprivation index, smoking status and ethnicity at baseline

**eTable 4. Risk of subsequent development of chronic diseases in the incident only sensitivity analysis**

|                            | All cardiovascular disease |                  | Heart failure               |                  | Ischaemic heart disease  |                  | Stroke/transient-ischaemic attack |                  | Peripheral vascular disease |                  |
|----------------------------|----------------------------|------------------|-----------------------------|------------------|--------------------------|------------------|-----------------------------------|------------------|-----------------------------|------------------|
|                            | Exposed                    | Unexposed        | Exposed                     | Unexposed        | Exposed                  | Unexposed        | Exposed                           | Unexposed        | Exposed                     | Unexposed        |
| Number of patients         | 28,268                     | 115,246          | 31,444                      | 124,737          | 29,616                   | 119,256          | 30,708                            | 122,618          | 31,490                      | 124,890          |
| Number of outcomes, n(%)   | 1,473 (5.21)               | 5,196 (4.51)     | 409 (1.30)                  | 1,455 (1.17)     | 715 (2.41)               | 2,303 (1.93)     | 745 (2.43)                        | 2,604 (2.12)     | 272 (0.86)                  | 784 (0.63)       |
| Person-years               | 171,643                    | 668,935          | 193,503                     | 734,319          | 180,791                  | 698,131          | 188,372                           | 718,635          | 193,366                     | 734,953          |
| IR (per 1000 person-years) | 8.58                       | 7.77             | 2.11                        | 1.98             | 3.95                     | 3.3              | 3.95                              | 3.62             | 1.41                        | 1.07             |
| Follow-up, Median(IQR)     | 5.37 (2.41-8.99)           | 4.99 (2.19-8.68) | 5.46 (2.47-9.12)            | 5.09 (2.24-8.80) | 5.41 (2.43-9.04)         | 5.05 (2.22-8.75) | 5.44 (2.47-9.08)                  | 5.06 (2.23-8.76) | 5.45 (2.46-9.11)            | 5.08 (2.24-8.80) |
| HR (95% CI)*               | 1.10 (1.04-1.17)           |                  | 1.06 (0.95-1.19)            |                  | 1.20 (1.10-1.30)         |                  | 1.09 (1.00-1.18)                  |                  | 1.32 (1.15-1.51)            |                  |
| P value                    | p<0.01                     |                  | p=0.27                      |                  | p<0.01                   |                  | p=0.04                            |                  | p<0.01                      |                  |
| aHR (95% CI)**             | 1.17 (1.10-1.24)           |                  | 1.07 (0.96-1.20)            |                  | 1.23 (1.13-1.34)         |                  | 1.12 (1.03-1.22)                  |                  | 1.32 (1.15-1.52)            |                  |
| P value                    | p<0.01                     |                  | p=0.23                      |                  | p<0.01                   |                  | p<0.01                            |                  | p<0.01                      |                  |
|                            | Vascular dementia          |                  | All cardiometabolic disease |                  | Type 2 diabetes mellitus |                  | Hypertension                      |                  | All autoimmune conditions   |                  |
|                            | Exposed                    | Unexposed        | Exposed                     | Unexposed        | Exposed                  | Unexposed        | Exposed                           | Unexposed        | Exposed                     | Unexposed        |
| Number of patients         | 31,879                     | 126,074          | 24,480                      | 99,676           | 29,842                   | 119,505          | 25,371                            | 102,283          | 29,135                      | 117,330          |
| Number of outcomes, n(%)   | 148 (0.46)                 | 474 (0.38)       | 2,310 (9.44)                | 8,363 (8.39)     | 1,355 (4.54)             | 3,913 (3.27)     | 1,881 (7.41)                      | 7,192 (7.03)     | 964 (3.31)                  | 2,700 (2.30)     |
| Person-years               | 196,449                    | 743,531          | 142,524                     | 554,252          | 179,645                  | 693,204          | 148,885                           | 572,392          | 152,881                     | 627,091          |
| IR (per 1000 person-years) | 0.75                       | 0.64             | 16.21                       | 15.09            | 7.54                     | 5.64             | 12.63                             | 12.56            | 6.31                        | 4.31             |
| Follow-up, Median(IQR)     | 5.47 (2.48-9.13)           | 5.10 (2.25-8.81) | 5.02 (2.21-8.68)            | 4.68 (2.02-8.32) | 5.27 (2.35-8.96)         | 4.98 (2.18-8.68) | 5.09 (2.25-8.72)                  | 4.73 (2.04-8.38) | 4.24 (1.75-7.95)            | 4.41 (1.85-8.05) |
| HR (95% CI)*               | 1.17 (0.98-1.41)           |                  | 1.07 (1.03-1.12)            |                  | 1.34 (1.26-1.42)         |                  | 1.01 (0.96-1.06)                  |                  | 1.47 (1.37-1.59)            |                  |

|                            | <b>Type 1 diabetes mellitus</b> |                  | <b>Rheumatoid arthritis</b> |                  | <b>Systemic lupus erythematosus</b> |                  | <b>Sjogren</b>   |                  | <b>Vitiligo</b>               |                  |
|----------------------------|---------------------------------|------------------|-----------------------------|------------------|-------------------------------------|------------------|------------------|------------------|-------------------------------|------------------|
|                            | Exposed                         | Unexposed        | Exposed                     | Unexposed        | Exposed                             | Unexposed        | Exposed          | Unexposed        | Exposed                       | Unexposed        |
| P value                    | p=0.09                          |                  | p<0.01                      |                  | p<0.01                              |                  | p=0.83           |                  | p<0.01                        |                  |
| aHR (95% CI)**             | 1.20 (1.00-1.45)                |                  | 1.07 (1.02-1.12)            |                  | 1.30 (1.22-1.38)                    |                  | 1.01 (0.96-1.06) |                  | 1.48 (1.37-1.59)              |                  |
| P value                    | p=0.06                          |                  | p<0.01                      |                  | p<0.01                              |                  | p=0.77           |                  | p<0.01                        |                  |
| Number of patients         | 31,664                          | 125,442          | 31,565                      | 125,234          | 31,864                              | 126,089          | 31,910           | 126,159          | 31,838                        | 125,923          |
| Number of outcomes, n(%)   | 63 (0.20)                       | 120 (0.10)       | 146 (0.46)                  | 409 (0.33)       | 45 (0.14)                           | 72 (0.06)        | 44 (0.14)        | 63 (0.05)        | 63 (0.20)                     | 138 (0.11)       |
| Person-years               | 194,829                         | 739,746          | 193,993                     | 737,315          | 196,108                             | 743,639          | 196,422          | 744,022          | 195,815                       | 742,249          |
| IR (per 1000 person-years) | 0.32                            | 0.16             | 0.75                        | 0.55             | 0.23                                | 0.1              | 0.22             | 0.08             | 0.32                          | 0.19             |
| Follow-up, Median(IQR)     | 5.46 (2.47-9.13)                | 5.10 (2.25-8.82) | 5.45 (2.47-9.11)            | 5.09 (2.25-8.80) | 5.46 (2.47-9.13)                    | 5.10 (2.25-8.81) | 5.47 (2.47-9.13) | 5.10 (2.25-8.81) | 5.46 (2.47-9.12)              | 5.10 (2.25-8.81) |
| HR (95% CI)*               | 2.01 (1.48-2.72)                |                  | 1.35 (1.12-1.64)            |                  | 2.37 (1.64-3.45)                    |                  | 2.64 (1.79-3.87) |                  | 1.74 (1.29-2.34)              |                  |
| P value                    | p<0.01                          |                  | p<0.01                      |                  | p<0.01                              |                  | p<0.01           |                  | p<0.01                        |                  |
| aHR (95% CI)**             | 1.84 (1.35-2.51)                |                  | 1.37 (1.13-1.66)            |                  | 2.45 (1.68-3.57)                    |                  | 2.57 (1.74-3.80) |                  | 1.59 (1.18-2.16)              |                  |
| P value                    | p<0.01                          |                  | p<0.01                      |                  | p<0.01                              |                  | p<0.01           |                  | p<0.01                        |                  |
|                            | <b>Psoriasis</b>                |                  | <b>Pernicious anaemia</b>   |                  | <b>Inflammatory bowel disease</b>   |                  | <b>Coeliac</b>   |                  | <b>Autoimmune thyroiditis</b> |                  |
|                            | Exposed                         | Unexposed        | Exposed                     | Unexposed        | Exposed                             | Unexposed        | Exposed          | Unexposed        | Exposed                       | Unexposed        |
| Number of patients         | 30,606                          | 121,720          | 31,834                      | 125,821          | 31,651                              | 125,247          | 31,849           | 125,942          | 31,864                        | 125,870          |
| Number of outcomes, n(%)   | 443 (1.45)                      | 1,294 (1.06)     | 89 (0.28)                   | 243 (0.19)       | 105 (0.33)                          | 321 (0.26)       | 56 (0.18)        | 173 (0.14)       | 50 (0.16)                     | 144 (0.11)       |
| Person-years               | 186,612                         | 712,529          | 195,847                     | 741,633          | 194,586                             | 737,712          | 195,911          | 742,372          | 196,034                       | 741,787          |
| IR (per 1000 person-years) | 2.37                            | 1.82             | 0.45                        | 0.33             | 0.54                                | 0.44             | 0.29             | 0.23             | 0.26                          | 0.19             |
| Follow-up, Median(IQR)     | 5.40 (2.43-9.03)                | 5.04 (2.22-8.75) | 5.46 (2.48-9.12)            | 5.10 (2.25-8.81) | 5.45 (2.47-9.12)                    | 5.10 (2.25-8.81) | 5.46 (2.47-9.12) | 5.10 (2.25-8.81) | 5.46 (2.47-9.12)              | 5.10 (2.25-8.81) |

| HR (95% CI)*                                                                                                                           | 1.31 (1.17-1.46) | 1.39 (1.09-1.77) | 1.24 (1.00-1.55)             | 1.23 (0.91-1.66) | 1.32 (0.95-1.82) |                  |                  |                  |                       |                  |
|----------------------------------------------------------------------------------------------------------------------------------------|------------------|------------------|------------------------------|------------------|------------------|------------------|------------------|------------------|-----------------------|------------------|
| P value                                                                                                                                | p<0.01           | p<0.01           | p=0.05                       | p=0.18           | p=0.09           |                  |                  |                  |                       |                  |
| aHR (95% CI)**                                                                                                                         | 1.31 (1.18-1.46) | 1.41 (1.10-1.80) | 1.23 (0.98-1.53)             | 1.26 (0.93-1.70) | 1.29 (0.93-1.78) |                  |                  |                  |                       |                  |
| P value                                                                                                                                | p<0.01           | p<0.01           | p=0.07                       | p=0.14           | p=0.12           |                  |                  |                  |                       |                  |
|                                                                                                                                        | Scleroderma      |                  | All mental health conditions |                  | Depression       |                  | Anxiety          |                  | Severe mental illness |                  |
|                                                                                                                                        | Exposed          | Unexposed        | Exposed                      | Unexposed        | Exposed          | Unexposed        | Exposed          | Unexposed        | Exposed               | Unexposed        |
| Number of patients                                                                                                                     | 31,945           | 126,219          | 21,932                       | 99,081           | 24,781           | 106,937          | 27,074           | 114,125          | 31,265                | 124,627          |
| Number of outcomes, n(%)                                                                                                               | 5 (0.02)         | 16 (0.01)        | 2,450 (11.17)                | 7,513 (7.58)     | 1,955 (7.89)     | 5,746 (5.37)     | 1,586 (5.86)     | 4,127 (3.62)     | 202 (0.65)            | 418 (0.34)       |
| Person-years                                                                                                                           | 196,725          | 744,579          | 124,610                      | 551,747          | 144,563          | 605,666          | 158,613          | 653,590          | 192,266               | 734,597          |
| IR (per 1000 person-years)                                                                                                             | 0.03             | 0.02             | 19.66                        | 13.62            | 13.52            | 9.49             | 10               | 6.31             | 1.05                  | 0.57             |
| Follow-up, Median(IQR)                                                                                                                 | 5.47 (2.48-9.13) | 5.10 (2.25-8.82) | 4.83 (2.13-8.47)             | 4.69 (2.03-8.35) | 5.00 (2.22-8.70) | 4.80 (2.09-8.49) | 5.08 (2.27-8.73) | 4.90 (2.14-8.57) | 5.45 (2.47-9.12)      | 5.10 (2.25-8.81) |
| HR (95% CI)*                                                                                                                           | 1.19 (0.43-3.24) |                  | 1.45 (1.38-1.51)             |                  | 1.43 (1.36-1.51) |                  | 1.58 (1.50-1.68) |                  | 1.85 (1.57-2.19)      |                  |
| P value                                                                                                                                | p=0.74           |                  | p<0.01                       |                  | p<0.01           |                  | p<0.01           |                  | p<0.01                |                  |
| aHR (95% CI)**                                                                                                                         | 1.20 (0.43-3.32) |                  | 1.47 (1.40-1.53)             |                  | 1.45 (1.37-1.52) |                  | 1.58 (1.49-1.68) |                  | 1.86 (1.57-2.20)      |                  |
| P value                                                                                                                                | p=0.72           |                  | p<0.01                       |                  | p<0.01           |                  | p<0.01           |                  | p<0.01                |                  |
| * Unadjusted hazard ratio, IR: incidence rate, HR: hazard ratio, aHR: adjusted hazard ratio                                            |                  |                  |                              |                  |                  |                  |                  |                  |                       |                  |
| ** Adjusted hazard ratio: adjusted for age, sex, body mass index, Townsend deprivation index, smoking status and ethnicity at baseline |                  |                  |                              |                  |                  |                  |                  |                  |                       |                  |



**eTable 5. Baseline characteristics of the periodontitis cohort**

|                               | Periodontitis only cohort |                    |
|-------------------------------|---------------------------|--------------------|
|                               | Exposed<br>n (%)          | Unexposed<br>n (%) |
| All                           | (n=3,384)                 | (n=12,893)         |
| Sex (Male)                    | 1560 (46.10)              | 5927 (45.97)       |
| Age at index date             | 48.10 (17.43)             | 47.81 (17.25)      |
| Age categories                |                           |                    |
| 18 - 24 years                 | 330 (9.75)                | 1269 (9.84)        |
| 25 - 34 years                 | 502 (14.83)               | 1952 (15.14)       |
| 35 - 44 years                 | 650 (19.21)               | 2515 (19.51)       |
| 45 - 54 years                 | 701 (20.72)               | 2646 (20.52)       |
| 55 - 64 years                 | 560 (16.55)               | 2148 (16.66)       |
| 65 - 74 years                 | 369 (10.90)               | 1368 (10.61)       |
| 75 & overs                    | 272 (8.04)                | 995 (7.72)         |
| BMI                           | 26.49 (5.62)              | 26.43 (5.43)       |
| BMI Categories                |                           |                    |
| Under/Normal weight (18.5-25) | 1203 (35.55)              | 4539 (35.21)       |
| Overweight (25-30)            | 905 (26.74)               | 3475 (26.95)       |
| Obese (>30)                   | 571 (16.87)               | 2122 (16.46)       |
| Missing                       | 705 (20.83)               | 2757 (21.38)       |
| Townsend quintiles            |                           |                    |
| 1 (Least deprived)            | 584 (17.26)               | 2128 (16.51)       |
| 2                             | 580 (17.14)               | 2051 (15.91)       |
| 3                             | 614 (18.14)               | 2187 (16.96)       |
| 4                             | 644 (19.03)               | 2135 (16.56)       |
| 5 (Most deprived)             | 520 (15.37)               | 1616 (12.53)       |
| Missing                       | 442 (13.06)               | 2776 (21.53)       |
| Smoking categories            |                           |                    |
| Non-smoker                    | 1359 (40.16)              | 5221 (40.49)       |
| Smoker                        | 1124 (33.22)              | 4274 (33.15)       |
| Ex-smoker                     | 585 (17.29)               | 2224 (17.25)       |
| Missing                       | 316 (9.34)                | 1174 (9.11)        |
| Ethnicity                     |                           |                    |
| Caucasian                     | 1271 (37.56)              | 4906 (38.05)       |
| Mixed race                    | 21 (0.62)                 | 67 (0.52)          |
| Other                         | 5 (0.15)                  | 40 (0.31)          |
| Black                         | 45 (1.33)                 | 132 (1.02)         |
| South Asian                   | 82 (2.42)                 | 170 (1.32)         |
| Missing                       | 1960 (57.92)              | 7578 (58.78)       |

**eTable 6. Risk of chronic diseases at baseline in the periodontitis only sensitivity analysis cohort**

|                                                     | All cardiovascular disease |            | Heart failure               |               | Ischaemic heart disease      |            | Stroke/transient-ischaemic attack |               | Peripheral vascular disease |            |
|-----------------------------------------------------|----------------------------|------------|-----------------------------|---------------|------------------------------|------------|-----------------------------------|---------------|-----------------------------|------------|
|                                                     | Exposed                    | Unexposed  | Exposed                     | Unexposed     | Exposed                      | Unexposed  | Exposed                           | Unexposed     | Exposed                     | Unexposed  |
| Total number of patients                            | 3,384                      | 12,893     | 3,384                       | 12,893        | 3,384                        | 12,893     | 3,384                             | 12,893        | 3,384                       | 12,893     |
| Number of patients with condition at baseline, n(%) | 355 (10.49)                | 971 (7.53) | 53 (1.57)                   | 120 (0.93)    | 244 (7.21)                   | 607 (4.71) | 112 (3.31)                        | 297 (2.30)    | 59 (1.74)                   | 141 (1.09) |
| OR (95% CI)*                                        | 1.44 (1.27-1.64)           |            | 1.69 (1.22-2.35)            |               | 1.57 (1.35-1.83)             |            | 1.45 (1.16-1.81)                  |               | 1.60 (1.18-2.18)            |            |
| P value                                             | p<0.01                     |            | p<0.01                      |               | p<0.01                       |            | p<0.01                            |               | p<0.01                      |            |
| aOR (95% CI)**                                      | 1.50 (1.30-1.74)           |            | 1.71 (1.22-2.41)            |               | 1.64 (1.38-1.94)             |            | 1.43 (1.14-1.81)                  |               | 1.57 (1.15-2.15)            |            |
| P value                                             | p<0.01                     |            | p<0.01                      |               | p<0.01                       |            | p<0.01                            |               | p<0.01                      |            |
|                                                     | Vascular dementia          |            | All cardiometabolic disease |               | Type 2 diabetes mellitus     |            | Hypertension                      |               | All autoimmune conditions   |            |
|                                                     | Exposed                    | Unexposed  | Exposed                     | Unexposed     | Exposed                      | Unexposed  | Exposed                           | Unexposed     | Exposed                     | Unexposed  |
| Total number of patients, n                         | 3,384                      | 12,893     | 3,384                       | 12,893        | 3,384                        | 12,893     | 3,384                             | 12,893        | 3,384                       | 12,893     |
| Number of patients with condition at baseline, n(%) | 4 (0.12)                   | 18 (0.14)  | 659 (19.47)                 | 2,221 (17.23) | 172 (5.08)                   | 529 (4.10) | 590 (17.43)                       | 2,006 (15.56) | 286 (8.45)                  | 836 (6.48) |
| OR (95% CI)*                                        | 0.85 (0.29-2.50)           |            | 1.16 (1.06-1.28)            |               | 1.25 (1.05-1.49)             |            | 1.15 (1.04-1.27)                  |               | 1.33 (1.16-1.53)            |            |
| P value                                             | p=0.76                     |            | p<0.01                      |               | p=0.01                       |            | p<0.01                            |               | p<0.01                      |            |
| aOR (95% CI)**                                      | 0.71 (0.23-2.19)           |            | 1.19 (1.06-1.34)            |               | 1.25 (1.03-1.51)             |            | 1.17 (1.04-1.32)                  |               | 1.32 (1.15-1.52)            |            |
| P value                                             | p=0.55                     |            | p<0.01                      |               | p=0.02                       |            | p<0.01                            |               | p<0.01                      |            |
|                                                     | Type 1 diabetes mellitus   |            | Rheumatoid arthritis        |               | Systemic lupus erythematosus |            | Sjogren                           |               | Vitiligo                    |            |
|                                                     | Exposed                    | Unexposed  | Exposed                     | Unexposed     | Exposed                      | Unexposed  | Exposed                           | Unexposed     | Exposed                     | Unexposed  |
| Total number of patients, n                         | 3,384                      | 12,893     | 3,384                       | 12,893        | 3,384                        | 12,893     | 3,384                             | 12,893        | 3,384                       | 12,893     |

|                                                     |                    |            |                                     |               |                                   |               |                  |              |                               |            |
|-----------------------------------------------------|--------------------|------------|-------------------------------------|---------------|-----------------------------------|---------------|------------------|--------------|-------------------------------|------------|
| Number of patients with condition at baseline, n(%) | 43 (1.27)          | 79 (0.61)  | 37 (1.09)                           | 96 (0.74)     | 10 (0.30)                         | 20 (0.16)     | 4 (0.12)         | 9 (0.07)     | 13 (0.38)                     | 25 (0.19)  |
| OR (95% CI)*                                        | 2.09 (1.44-3.03)   |            | 1.47 (1.01-2.16)                    |               | 1.91 (0.89-4.08)                  |               | 1.69 (0.52-5.50) |              | 1.98 (1.01-3.88)              |            |
| P value                                             | p<0.01             |            | p=0.05                              |               | p=0.10                            |               | p=0.38           |              | p=0.05                        |            |
| aOR (95% CI)**                                      | 2.07 (1.42-3.02)   |            | 1.44 (0.98-2.13)                    |               | 1.82 (0.84-3.93)                  |               | 1.45 (0.44-4.79) |              | 1.99 (1.01-3.92)              |            |
| P value                                             | p<0.01             |            | p=0.06                              |               | p=0.13                            |               | p=0.54           |              | p=0.05                        |            |
|                                                     | <b>Psoriasis</b>   |            | <b>Pernicious anaemia</b>           |               | <b>Inflammatory bowel disease</b> |               | <b>Coeliac</b>   |              | <b>Autoimmune thyroiditis</b> |            |
|                                                     | Exposed            | Unexposed  | Exposed                             | Unexposed     | Exposed                           | Unexposed     | Exposed          | Unexposed    | Exposed                       | Unexposed  |
| Total number of patients, n                         | 3,384              | 12,893     | 3,384                               | 12,893        | 3,384                             | 12,893        | 3,384            | 12,893       | 3,384                         | 12,893     |
| Number of patients with condition at baseline, n(%) | 125 (3.69)         | 437 (3.39) | 14 (0.41)                           | 31 (0.24)     | 36 (1.06)                         | 94 (0.73)     | 8 (0.24)         | 32 (0.25)    | 9 (0.27)                      | 42 (0.33)  |
| OR (95% CI)*                                        | 1.09 (0.89-1.34)   |            | 1.72 (0.92-3.24)                    |               | 1.46 (1.00-2.15)                  |               | 0.95 (0.44-2.07) |              | 0.82 (0.40-1.68)              |            |
| P value                                             | p=0.39             |            | p=0.09                              |               | p=0.05                            |               | p=0.90           |              | p=0.58                        |            |
| aOR (95% CI)**                                      | 1.09 (0.89-1.34)   |            | 1.54 (0.81-2.92)                    |               | 1.45 (0.98-2.14)                  |               | 0.98 (0.45-2.15) |              | 0.81 (0.39-1.67)              |            |
| P value                                             | p=0.40             |            | p=0.19                              |               | p=0.06                            |               | p=0.97           |              | p=0.57                        |            |
|                                                     | <b>Scleroderma</b> |            | <b>All mental health conditions</b> |               | <b>Depression</b>                 |               | <b>Anxiety</b>   |              | <b>Severe mental illness</b>  |            |
|                                                     | Exposed            | Unexposed  | Exposed                             | Unexposed     | Exposed                           | Unexposed     | Exposed          | Unexposed    | Exposed                       | Unexposed  |
| Total number of patients, n                         | 3,384              | 12,893     | 3,384                               | 12,893        | 3,384                             | 12,893        | 3,384            | 12,893       | 3,384                         | 12,893     |
| Number of patients with condition at baseline, n(%) | 7 (0.21)           | 7 (0.05)   | 1,021 (30.17)                       | 2,745 (21.29) | 704 (20.80)                       | 1,942 (15.06) | 531 (15.69)      | 1,252 (9.71) | 70 (2.07)                     | 149 (1.16) |
| OR (95% CI)*                                        | 3.82 (1.34-10.89)  |            | 1.60 (1.47-1.74)                    |               | 1.48 (1.35-1.63)                  |               | 1.73 (1.55-1.93) |              | 1.81 (1.36-2.41)              |            |
| P value                                             | p=0.01             |            | p<0.01                              |               | p<0.01                            |               | p<0.01           |              | p<0.01                        |            |

|                |                   |                  |                  |                  |                  |
|----------------|-------------------|------------------|------------------|------------------|------------------|
| aOR (95% CI)** | 4.18 (1.45-12.10) | 1.63 (1.49-1.78) | 1.50 (1.36-1.66) | 1.74 (1.55-1.94) | 1.83 (1.37-2.44) |
| P value        | p<0.01            | p<0.01           | p<0.01           | p<0.01           | p<0.01           |

\* Unadjusted odds ratio, OR: odds ratio, aOR: adjusted odds ratio

\*\* Adjusted odds ratio: adjusted for age, sex, body mass index, Townsend deprivation index, smoking status and ethnicity at baseline

**eTable 7. Risk of subsequent development of chronic diseases in the periodontitis only sensitivity analysis**

|                            | All cardiovascular disease |                   | Heart failure               |                   | Ischaemic heart disease  |                   | Stroke/transient-ischaemic attack |                   | Peripheral vascular disease |                   |
|----------------------------|----------------------------|-------------------|-----------------------------|-------------------|--------------------------|-------------------|-----------------------------------|-------------------|-----------------------------|-------------------|
|                            | Exposed                    | Unexposed         | Exposed                     | Unexposed         | Exposed                  | Unexposed         | Exposed                           | Unexposed         | Exposed                     | Unexposed         |
| Number of patients         | 3,029                      | 11,922            | 3,331                       | 12,773            | 3,140                    | 12,286            | 3,272                             | 12,596            | 3,325                       | 12,752            |
| Number of outcomes, n(%)   | 221 (7.30)                 | 646 (5.42)        | 57 (1.71)                   | 156 (1.22)        | 106 (3.38)               | 301 (2.45)        | 97 (2.96)                         | 311 (2.47)        | 47 (1.41)                   | 101 (0.79)        |
| Person-years               | 21,705                     | 80,954            | 24,737                      | 88,720            | 22,881                   | 84,397            | 24,127                            | 86,844            | 24,625                      | 88,567            |
| IR (per 1000 person-years) | 10.18                      | 7.98              | 2.3                         | 1.76              | 4.63                     | 3.57              | 4.02                              | 3.58              | 1.91                        | 1.14              |
| Follow-up, Median(IQR)     | 5.92 (2.63-10.83)          | 5.60 (2.30-10.26) | 6.31 (2.81-11.32)           | 5.83 (2.42-10.46) | 6.19 (2.75-11.03)        | 5.70 (2.36-10.36) | 6.23 (2.81-11.15)                 | 5.73 (2.39-10.37) | 6.29 (2.77-11.23)           | 5.83 (2.42-10.48) |
| HR (95% CI)*               | 1.27 (1.09-1.48)           |                   | 1.30 (0.96-1.77)            |                   | 1.30 (1.04-1.62)         |                   | 1.12 (0.89-1.41)                  |                   | 1.67 (1.18-2.36)            |                   |
| P value                    | p<0.01                     |                   | p=0.09                      |                   | p=0.02                   |                   | p=0.33                            |                   | p<0.01                      |                   |
| aHR (95% CI)**             | 1.31 (1.12-1.52)           |                   | 1.27 (0.94-1.73)            |                   | 1.35 (1.08-1.69)         |                   | 1.12 (0.89-1.41)                  |                   | 1.67 (1.18-2.38)            |                   |
| P value                    | p<0.01                     |                   | p=0.12                      |                   | p<0.01                   |                   | p=0.34                            |                   | p<0.01                      |                   |
|                            | Vascular dementia          |                   | All cardiometabolic disease |                   | Type 2 diabetes mellitus |                   | Hypertension                      |                   | All autoimmune conditions   |                   |
|                            | Exposed                    | Unexposed         | Exposed                     | Unexposed         | Exposed                  | Unexposed         | Exposed                           | Unexposed         | Exposed                     | Unexposed         |
| Number of patients         | 3,380                      | 12,875            | 2,725                       | 10,672            | 3,212                    | 12,364            | 2,794                             | 10,887            | 3,098                       | 12,057            |
| Number of outcomes, n(%)   | 20 (0.59)                  | 55 (0.43)         | 303 (11.12)                 | 1,133 (10.62)     | 173 (5.39)               | 449 (3.63)        | 247 (8.84)                        | 982 (9.02)        | 104 (3.36)                  | 308 (2.55)        |
| Person-years               | 25,137                     | 89,654            | 18,750                      | 68,456            | 23,111                   | 84,508            | 19,504                            | 70,497            | 19,592                      | 74,615            |
| IR (per 1000 person-years) | 0.8                        | 0.61              | 16.16                       | 16.55             | 7.49                     | 5.31              | 12.66                             | 13.93             | 5.31                        | 4.13              |
| Follow-up, Median(IQR)     | 6.31 (2.84-11.32)          | 5.86 (2.44-10.51) | 5.54 (2.38-10.38)           | 5.16 (2.12-9.61)  | 6.00 (2.65-10.90)        | 5.66 (2.34-10.32) | 5.67 (2.45-10.54)                 | 5.23 (2.14-9.72)  | 4.86 (1.93-9.57)            | 4.89 (1.89-9.45)  |
| HR (95% CI)*               | 1.27 (0.76-2.12)           |                   | 0.97 (0.86-1.10)            |                   | 1.40 (1.18-1.67)         |                   | 0.90 (0.79-1.04)                  |                   | 1.25 (1.00-1.56)            |                   |

|                            | Type 1 diabetes mellitus |                   | Rheumatoid arthritis |                   | Systemic lupus erythematosus |                   | Sjogren           |                   | Vitiligo               |                   |
|----------------------------|--------------------------|-------------------|----------------------|-------------------|------------------------------|-------------------|-------------------|-------------------|------------------------|-------------------|
|                            | Exposed                  | Unexposed         | Exposed              | Unexposed         | Exposed                      | Unexposed         | Exposed           | Unexposed         | Exposed                | Unexposed         |
| P value                    | p=0.36                   |                   | p=0.65               |                   | p<0.01                       |                   | p=0.16            |                   | p=0.05                 |                   |
| aHR (95% CI)**             | 1.23 (0.73-2.07)         |                   | 0.96 (0.85-1.10)     |                   | 1.43 (1.20-1.71)             |                   | 0.91 (0.79-1.05)  |                   | 1.21 (0.96-1.51)       |                   |
| P value                    | p=0.44                   |                   | p=0.57               |                   | p<0.01                       |                   | p=0.20            |                   | p=0.10                 |                   |
| Number of patients         | 3,341                    | 12,814            | 3,347                | 12,797            | 3,374                        | 12,873            | 3,380             | 12,884            | 3,371                  | 12,868            |
| Number of outcomes, n(%)   | 8 (0.24)                 | 17 (0.13)         | 13 (0.39)            | 51 (0.40)         | 6 (0.18)                     | 10 (0.08)         | 6 (0.18)          | 3 (0.02)          | 8 (0.24)               | 9 (0.07)          |
| Person-years               | 24,868                   | 89,212            | 24,897               | 88,889            | 25,097                       | 89,628            | 25,152            | 89,766            | 25,066                 | 89,569            |
| IR (per 1000 person-years) | 0.32                     | 0.19              | 0.52                 | 0.57              | 0.24                         | 0.11              | 0.24              | 0.03              | 0.32                   | 0.1               |
| Follow-up, Median(IQR)     | 6.31 (2.81-11.32)        | 5.86 (2.44-10.51) | 6.31 (2.81-11.32)    | 5.83 (2.42-10.48) | 6.31 (2.84-11.32)            | 5.86 (2.44-10.51) | 6.31 (2.84-11.32) | 5.86 (2.44-10.51) | 6.31 (2.84-11.32)      | 5.85 (2.44-10.51) |
| HR (95% CI)*               | 1.71 (0.74-3.97)         |                   | 0.90 (0.49-1.66)     |                   | 2.13 (0.77-5.86)             |                   | 7.02 (1.76-28.09) |                   | 3.13 (1.21-8.13)       |                   |
| P value                    | p=0.21                   |                   | p=0.74               |                   | p=0.14                       |                   | p<0.01            |                   | p=0.02                 |                   |
| aHR (95% CI)**             | 1.62 (0.70-3.76)         |                   | 0.96 (0.52-1.77)     |                   | 2.15 (0.77-6.00)             |                   | 6.67 (1.66-26.86) |                   | 2.90 (1.11-7.61)       |                   |
| P value                    | p=0.26                   |                   | p=0.90               |                   | p=0.14                       |                   | p<0.01            |                   | p=0.03                 |                   |
|                            | Psoriasis                |                   | Pernicious anaemia   |                   | Inflammatory bowel disease   |                   | Coeliac           |                   | Autoimmune thyroiditis |                   |
|                            | Exposed                  | Unexposed         | Exposed              | Unexposed         | Exposed                      | Unexposed         | Exposed           | Unexposed         | Exposed                | Unexposed         |
| Number of patients         | 3,259                    | 12,456            | 3,370                | 12,862            | 3,348                        | 12,799            | 3,376             | 12,861            | 3,375                  | 12,851            |
| Number of outcomes, n(%)   | 49 (1.50)                | 165 (1.32)        | 13 (0.39)            | 25 (0.19)         | 13 (0.39)                    | 34 (0.27)         | 5 (0.15)          | 20 (0.16)         | 1 (0.03)               | 12 (0.09)         |
| Person-years               | 23,982                   | 85,868            | 25,033               | 89,510            | 24,901                       | 89,000            | 25,106            | 89,487            | 25,127                 | 89,498            |
| IR (per 1000 person-years) | 2.04                     | 1.92              | 0.52                 | 0.28              | 0.52                         | 0.38              | 0.2               | 0.22              | 0.04                   | 0.13              |
| Follow-up, Median(IQR)     | 6.25 (2.77-11.10)        | 5.76 (2.39-10.37) | 6.31 (2.84-11.25)    | 5.84 (2.44-10.50) | 6.31 (2.81-11.32)            | 5.85 (2.43-10.50) | 6.31 (2.82-11.32) | 5.85 (2.44-10.50) | 6.31 (2.84-11.32)      | 5.86 (2.44-10.51) |
| HR (95% CI)*               | 1.06 (0.77-1.46)         |                   | 1.85 (0.95-3.62)     |                   | 1.35 (0.71-2.57)             |                   | 0.90 (0.34-2.39)  |                   | 0.30 (0.04-2.29)       |                   |

|                                                                                                                                        | Scleroderma       |                   | All mental health conditions |                  | Depression        |                   | Anxiety           |                   | Severe mental illness |                   |
|----------------------------------------------------------------------------------------------------------------------------------------|-------------------|-------------------|------------------------------|------------------|-------------------|-------------------|-------------------|-------------------|-----------------------|-------------------|
|                                                                                                                                        | Exposed           | Unexposed         | Exposed                      | Unexposed        | Exposed           | Unexposed         | Exposed           | Unexposed         | Exposed               | Unexposed         |
| P value                                                                                                                                | p=0.71            |                   | p=0.07                       |                  | p=0.35            |                   | p=0.83            |                   | p=0.24                |                   |
| aHR (95% CI)**                                                                                                                         | 1.05 (0.76-1.44)  |                   | 1.89 (0.96-3.74)             |                  | 1.35 (0.71-2.57)  |                   | 0.85 (0.32-2.28)  |                   | 0.29 (0.04-2.23)      |                   |
| P value                                                                                                                                | p=0.78            |                   | p=0.07                       |                  | p=0.36            |                   | p=0.75            |                   | p=0.23                |                   |
| Number of patients                                                                                                                     | 3,377             | 12,886            | 2,363                        | 10,148           | 2,680             | 10,951            | 2,853             | 11,641            | 3,314                 | 12,744            |
| Number of outcomes, n(%)                                                                                                               | 2 (0.06)          | 3 (0.02)          | 287 (12.15)                  | 875 (8.62)       | 224 (8.36)        | 671 (6.13)        | 189 (6.62)        | 521 (4.48)        | 15 (0.45)             | 46 (0.36)         |
| Person-years                                                                                                                           | 25,152            | 89,739            | 16,121                       | 65,906           | 18,839            | 72,978            | 19,995            | 77,498            | 24,744                | 88,828            |
| IR (per 1000 person-years)                                                                                                             | 0.08              | 0.03              | 17.8                         | 13.28            | 11.89             | 9.19              | 9.45              | 6.72              | 0.61                  | 0.52              |
| Follow-up, Median(IQR)                                                                                                                 | 6.31 (2.84-11.32) | 5.86 (2.44-10.51) | 5.59 (2.33-10.37)            | 5.24 (2.09-9.85) | 5.76 (2.54-10.52) | 5.47 (2.21-10.09) | 5.77 (2.54-10.63) | 5.50 (2.24-10.04) | 6.34 (2.86-11.32)     | 5.86 (2.44-10.51) |
| HR (95% CI)*                                                                                                                           | 2.40 (0.40-14.36) |                   | 1.35 (1.18-1.54)             |                  | 1.30 (1.12-1.52)  |                   | 1.41 (1.19-1.66)  |                   | 1.18 (0.66-2.12)      |                   |
| P value                                                                                                                                | p=0.34            |                   | p<0.01                       |                  | p<0.01            |                   | p<0.01            |                   | p=0.57                |                   |
| aHR (95% CI)**                                                                                                                         | 2.26 (0.37-13.70) |                   | 1.33 (1.16-1.52)             |                  | 1.29 (1.11-1.50)  |                   | 1.37 (1.16-1.62)  |                   | 1.24 (0.69-2.23)      |                   |
| P value                                                                                                                                | p=0.37            |                   | p<0.01                       |                  | p<0.01            |                   | p<0.01            |                   | p=0.47                |                   |
| * Unadjusted hazard ratio, IR: incidence rate, HR: hazard ratio, aHR: adjusted hazard ratio                                            |                   |                   |                              |                  |                   |                   |                   |                   |                       |                   |
| ** Adjusted hazard ratio: adjusted for age, sex, body mass index, Townsend deprivation index, smoking status and ethnicity at baseline |                   |                   |                              |                  |                   |                   |                   |                   |                       |                   |
